# Supplementary material
Source: PubMed Central journal article supplement (PMC5718976)
Supplement: NIHMS909427-supplement-1.pdf [file NIHMS909427-supplement-1.pdf]

# Supplementary Figure S1

**A**

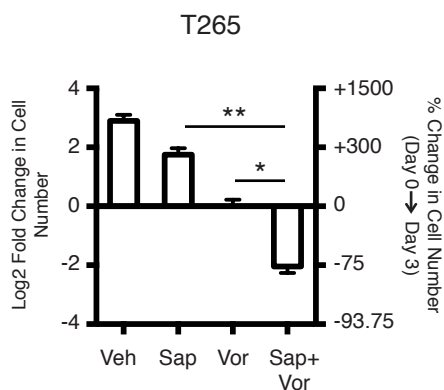

**B**

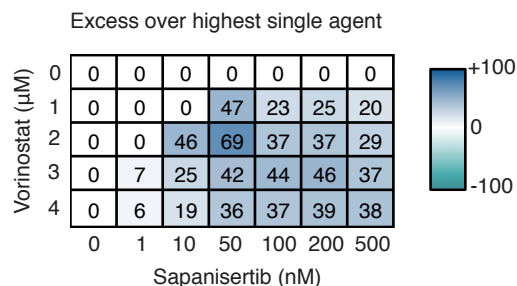

**Supplementary Figure S1.** MPNSTs are sensitive to combined HDAC and mTOR inhibition. **A)** p53 WT MPNST cell line T265 was treated with vehicle (veh), sapanisertib (200nM, sap), vorinostat (2μM, vor), or vorinostat and sapanisertib (200nM) for 3 days. Left y-axis indicates log<sub>2</sub> of fold change in cell number at 3 days relative to day 0. Right y-axis indicates percent change in cell number at 3 days on a log<sub>2</sub> scale. Error bars ±SD from technical triplicates. Two other p53 WT MPNST cell lines (88-14 and SNF96.2) were also sensitive to this combination (data not shown). **B)** Vorinostat and sapanisertib are synergistic according to Gaddum's non-interaction model, which is the most appropriate model for assessing synergy on cytotoxicity when at least one agent (sapanisertib) is purely cytostatic. 90-8TLs were treated with indicated drug concentrations for three days and viability was assessed by cell titer glow. The percent decrease in viability relative to day 0 was calculated as a proxy for cell death. The excess over the highest single agent was calculated and is shown in the matrix, with 100 indicating complete synergy, and -100 indicating complete antagonism. Boxes are shaded according to the color scale shown. \*p=0.000006, \*\*p<0.000001

## Supplementary Figure S2

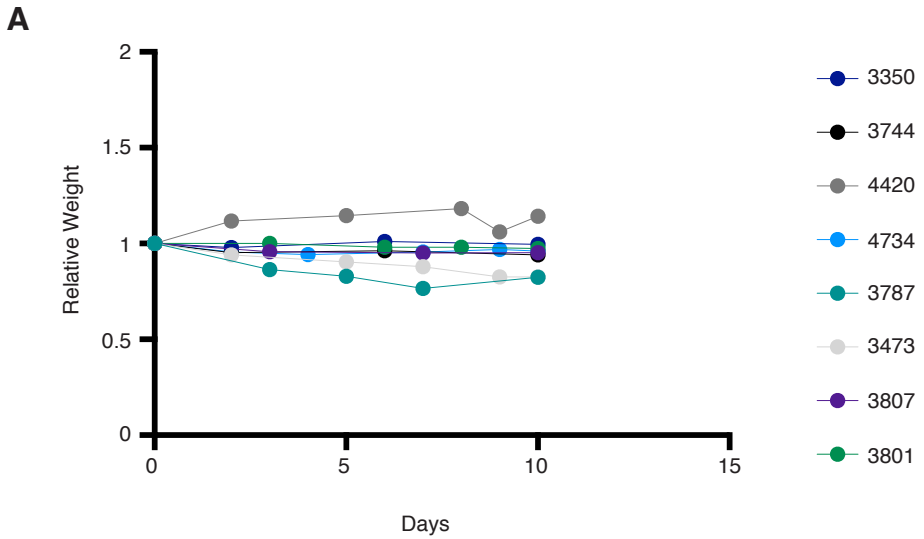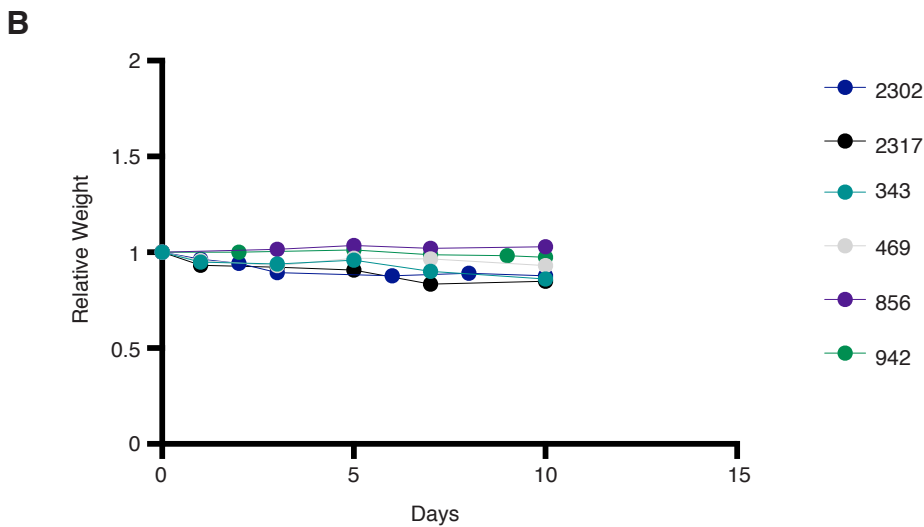

**Supplementary Figure S2.** Change in animal weight while on combination treatment. **A)** Weight of same animals in Figure 1G treated with rapamycin and vorinostat. Y-axis indicates relative weight (normalized to day 0 weight of individual animal). X-axis indicates days on treatment. Legend at right shows mouse number of each mouse. **B)** Weight of same animals in Figure 1J treated with sapanisertib and panobinostat. Y-axis indicates relative weight (normalized to day 0 weight of individual animal). X-axis indicates days on treatment. Legend at right shows mouse number of each mouse.

## Supplementary Figure S3

**A**

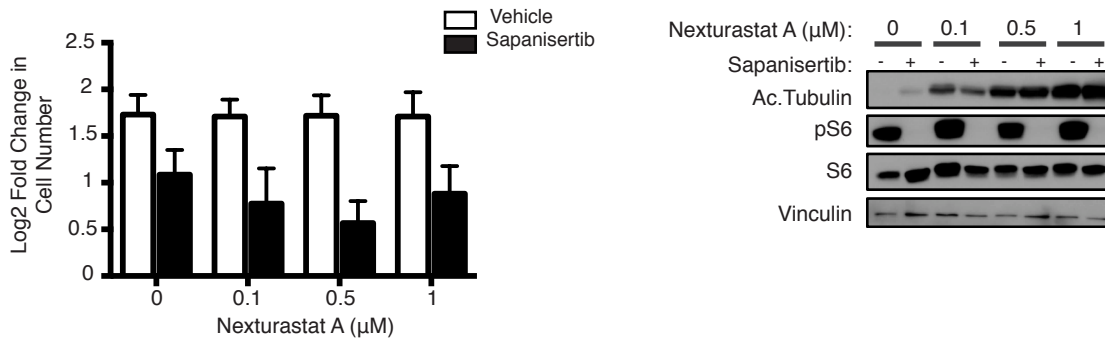

**B**

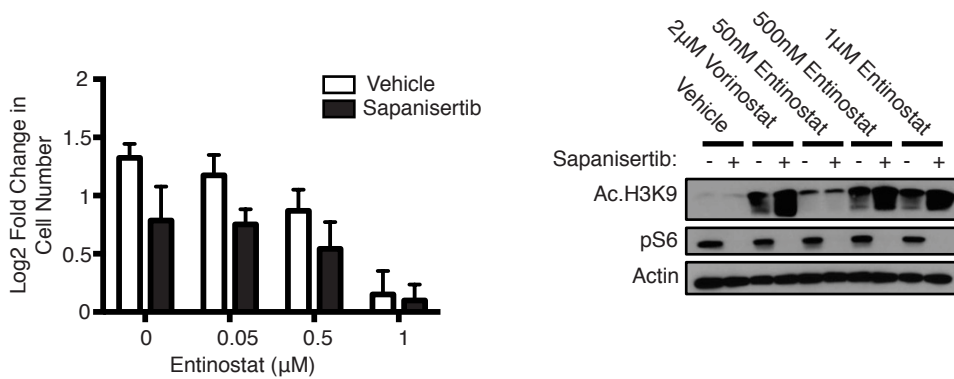

**Supplementary Figure S3. A)** 90-8TL cells were treated with Nexturastat A at concentration indicated, with (black) or without (white) 100nM sapanisertib. Graph depicts the mean log<sub>2</sub> fold change of cell number after 72 hours, relative to day 0 ±SD. At right, immunoblots depict acetylated lysine 9 on histone H3 (Ac. H3K9) and phosphorylated S6 (pS6). Total S6 and vinculin serve as a loading controls. **B)** 90-8TLs were treated with entinostat at indicated concentrations, with (black) or without (white) 100nM sapanisertib. At right, immunoblots depict acetylated lysine 9 on histone H3 (Ac. H3K9) and phosphorylated S6 (pS6). Actin serves as a loading control.

## Supplementary Figure S4

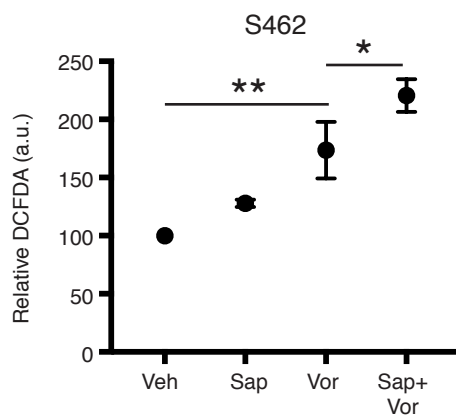

**Supplementary Figure S4.** Combined HDAC and mTOR inhibition increases reactive oxygen species in MPNSTs. **A)** Graph depicts relative mean fluorescence intensity of S462 cells stained with dichlorofluorescein diacetate (DCFDA), a dye that measures reactive oxygen species (ROS) and treated with vehicle (veh), sapanisertib (sap), vorinostat (vor), or vorinostat and sapanisertib (sap + vor) for 24 hours. Error bars indicate SD from three technical triplicates. \* $p=0.007277$ , \*\* $p=0.000441$

Supplementary Figure S5

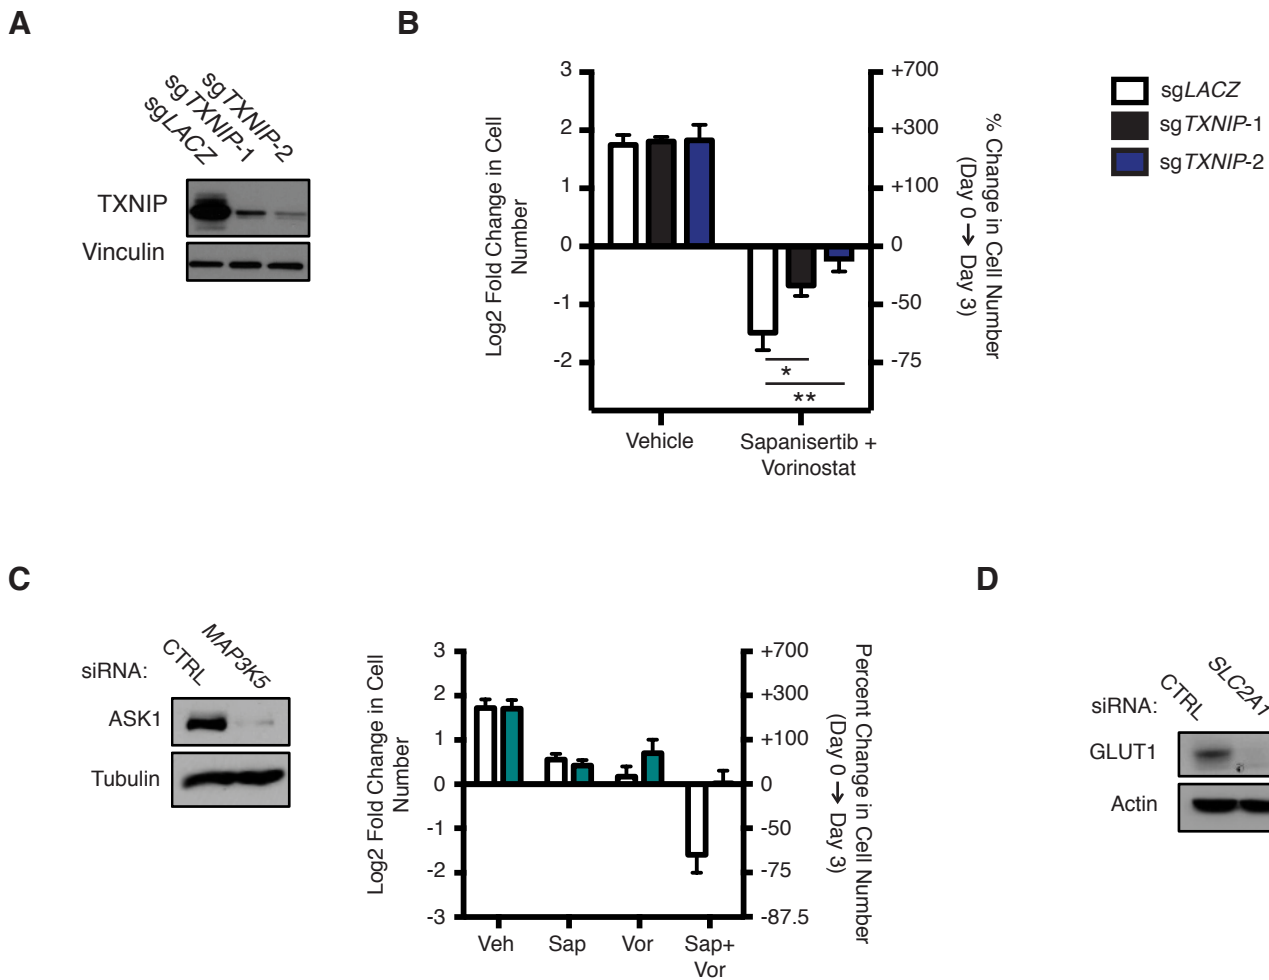

**Supplementary Figure S5.** TXNIP is required for combination induced MPNST cell death. **A)** 90-8TLs were infected with lentiCRISPRv2 expressing guides targeting *LACZ* or *TXNIP* as indicated. Immunoblot of TXNIP levels after 16 hours of sapanisertib and vorinostat treatment. Vinculin serves as a loading control. **B)** As in A, 90-8TLs were infected with lentiCRISPRv2 expressing guides against *LACZ* or *TXNIP* as indicated and treated with sapanisertib and vorinostat. Left y-axis indicates the log<sub>2</sub> of fold change in cell number after 3 days. The right y-axis indicates the percent change in cell number after 72 hours relative to day 0 on a log<sub>2</sub> scale. Error bars indicate SD of technical triplicates. \*p=0.016, \*\*p=0.00413 **C)** 90-8TLs were transfected with pooled siRNAs targeting MAP3K5 (ASK1) or non-targeting (CTRL) and treated with vehicle, sapanisertib (100nM), vorinostat (2μM), or sapanisertib and vorinostat. Left y-axis indicates the log<sub>2</sub> of fold change in cell number after 3 days. The right y-axis indicates the percent change in cell number after 72 hours relative to day 0 on a log<sub>2</sub> scale. Error bars indicate SD of technical triplicates. Vehicle and combination data are reprinted from Fig. 3K for clarity. Immunoblot showing ASK1 in 90-8TLs 72 hours after transfection with indicated siRNA (*MAP3K5* is the gene name for ASK1). Tubulin serves as a control. This immunoblot is a control for the experiment shown in Fig. 3K. **D)** Immunoblot showing GLUT1 in 90-8TLs 72 hours after transfection with indicated siRNA (*SLC2A1* is the gene name for GLUT1). Tubulin serves as a control. This immunoblot is a control for the experiment shown in Fig. 3L.

**Supplementary Table S1. Differentially expressed gene sets in MPNSTs treated with HDAC and mTOR inhibitors.** To identify the pathways that were deregulated in response to vorinostat and rapamycin 90-8TLs were treated with vehicle, sapanisertib (100nM), vorinostat (2 $\mu$ M), or combined sapanisertib + vorinostat for 24 hours and a microarray analysis was performed. Recurrent pathway-related gene sets that were differentially expressed in the combination treated cells relative to the other treatment groups (vehicle and monotherapies) are shown. Gene sets were considered significant if they reached a nominal p-value of <0.005 in at least one of the Efron-Tibshirani GSA test, LS permutation test, or KS permutation test as in Figure 2A. Gene sets were considered recurrent if at least three related gene sets reached significance.

|                                                                            |
|----------------------------------------------------------------------------|
| <b>Oxidative Stress</b>                                                    |
| <a href="#">CHUANG_OXIDATIVE_STRESS_RESPONSE_UP</a>                        |
| <a href="#">CHUANG_OXIDATIVE_STRESS_RESPONSE_DN</a>                        |
| <a href="#">WEIGEL_OXIDATIVE_STRESS_BY_TBH_AND_H2O2</a>                    |
| <a href="#">GARGALOVIC_RESPONSE_TO_OXIDIZED_PHOSPHOLIPIDS_TURQUOISE_DN</a> |
| <a href="#">KYNG_RESPONSE_TO_H2O2</a>                                      |
| <a href="#">GARGALOVIC_RESPONSE_TO_OXIDIZED_PHOSPHOLIPIDS_TURQUOISE_UP</a> |
| <a href="#">MOOTHA_ROS</a>                                                 |
| <a href="#">MOOTHA_FFA_OXYDATION</a>                                       |
| <b>ER stress</b>                                                           |
| <a href="#">REACTOME_UNFOLDED_PROTEIN_RESPONSE</a>                         |
| <a href="#">REACTOME_ACTIVATION_OF_CHAPERONES_BY_IRE1_ALPHA</a>            |
| <a href="#">REACTOME_ACTIVATION_OF_CHAPERONE_GENES_BY_ATF6_ALPHA</a>       |
| <a href="#">REACTOME_ACTIVATION_OF_CHAPERONES_BY_ATF6_ALPHA</a>            |
| <b>Senescence and aging</b>                                                |
| <a href="#">FRIDMAN_SENESCENCE_DN</a>                                      |
| <a href="#">TANG_SENESCENCE_TP53_TARGETS_DN</a>                            |
| <a href="#">LY_AGING_MIDDLE_DN</a>                                         |
| <a href="#">LY_AGING_OLD_DN</a>                                            |
| <a href="#">LY_AGING_PREMATURE_DN</a>                                      |
| <a href="#">KYNG_NORMAL_AGING_UP</a>                                       |
| <b>Hypoxia</b>                                                             |
| <a href="#">HARRIS_HYPOXIA</a>                                             |
| <a href="#">WEINMANN_ADAPTATION_TO_HYPOXIA_DN</a>                          |
| <a href="#">MENSE_HYPOXIA_UP</a>                                           |
| <a href="#">KRIEG_HYPOXIA_VIA_KDM3A</a>                                    |
| <a href="#">WEINMANN_ADAPTATION_TO_HYPOXIA_UP</a>                          |
| <a href="#">FARDIN_HYPOXIA_11</a>                                          |
| <a href="#">ELVIDGE_HIF1A_AND_HIF2A_TARGETS_DN</a>                         |
| <a href="#">ELVIDGE_HIF1A_TARGETS_DN</a>                                   |
| <b>IFN</b>                                                                 |
| <a href="#">REACTOME_ANTIVIRAL_MECHANISM_BY_IFN_STIMULATED_GENES</a>       |
| <a href="#">SANA_RESPONSE_TO_IFNG_DN</a>                                   |
| <a href="#">DER_IFN_ALPHA_RESPONSE_UP</a>                                  |
| <a href="#">DER_IFN_BETA_RESPONSE_UP</a>                                   |
| <a href="#">DER_IFN_GAMMA_RESPONSE_UP</a>                                  |
| <a href="#">REACTOME_INTERFERON_GAMMA_SIGNALING</a>                        |
| <a href="#">REACTOME_INTERFERON_ALPHA_BETA_SIGNALING</a>                   |
| <b>TNF</b>                                                                 |
| <a href="#">SANA_TNF_SIGNALING_UP</a>                                      |
| <a href="#">PID_TNFPATHWAY</a>                                             |
| <a href="#">PHONG_TNF_TARGETS_DN</a>                                       |
| <a href="#">PHONG_TNF_TARGETS_UP</a>                                       |
| <a href="#">TIAN_TNF_SIGNALING_NOT_VIA_NFKB</a>                            |
| <b>VEGF</b>                                                                |
| <a href="#">WESTON_VEGFA_TARGETS</a>                                       |
| <a href="#">ABE_VEGFA_TARGETS_2HR</a>                                      |
| <a href="#">WESTON_VEGFA_TARGETS_12HR</a>                                  |
| <a href="#">HELLEBREKERS_SILENCED_DURING_TUMOR_ANGIOGENESIS</a>            |
| <b>Viral infection</b>                                                     |
| <a href="#">BROWNE_HCMV_INFECTION_20HR_DN</a>                              |
| <a href="#">ZHU_CMV_24_HR_UP</a>                                           |
| <a href="#">ZHU_CMV_8_HR_UP</a>                                            |
| <a href="#">BROWNE_HCMV_INFECTION_2HR_DN</a>                               |
| <a href="#">BROWNE_HCMV_INFECTION_2HR_UP</a>                               |
| <a href="#">SONG_TARGETS_OF_IE86_CMV_PROTEIN</a>                           |
| <a href="#">ZHU_CMV_24_HR_DN</a>                                           |
| <b>Radiation</b>                                                           |
| <a href="#">GHANDHI_DIRECT_IRRADIATION_UP</a>                              |
| <a href="#">GHANDHI_BYSTANDER_IRRADIATION_UP</a>                           |
| <a href="#">AMUNDSON_GAMMA_RADIATION_RESPONSE</a>                          |

|                                                                                                   |
|---------------------------------------------------------------------------------------------------|
| <a href="#">SESTO_RESPONSE_TO_UV_C8</a>                                                           |
| <a href="#">GENTILE_UV_RESPONSE_CLUSTER_D8</a>                                                    |
| <a href="#">GENTILE_UV_RESPONSE_CLUSTER_D4</a>                                                    |
| <a href="#">GENTILE_UV_RESPONSE_CLUSTER_D9</a>                                                    |
| <a href="#">GENTILE_UV_LOW_DOSE_UP</a>                                                            |
| <a href="#">GENTILE_UV_RESPONSE_CLUSTER_D5</a>                                                    |
| <a href="#">GENTILE_UV_RESPONSE_CLUSTER_D7</a>                                                    |
| <a href="#">DAZARD_UV_RESPONSE_CLUSTER_G1</a>                                                     |
| <a href="#">SMIRNOV_RESPONSE_TO_IR_6HR_DN</a>                                                     |
| <a href="#">ZHOU_CELL_CYCLE_GENES_IN_IR_RESPONSE_6HR</a>                                          |
| <a href="#">SMIRNOV_RESPONSE_TO_IR_2HR_DN</a>                                                     |
| <a href="#">SMIRNOV_RESPONSE_TO_IR_2HR_UP</a>                                                     |
| <a href="#">ZHOU_CELL_CYCLE_GENES_IN_IR_RESPONSE_2HR</a>                                          |
| <b>P53</b>                                                                                        |
| <a href="#">AMUNDSON_DNA_DAMAGE_RESPONSE_TP53</a>                                                 |
| <a href="#">AMBROSINI_FLAVOPIRIDOL_TREATMENT_TP53</a>                                             |
| <a href="#">KEGG_P53_SIGNALING_PATHWAY</a>                                                        |
| <a href="#">SCIAN_CELL_CYCLE_TARGETS_OF_TP53_AND_TP73_DN</a>                                      |
| <a href="#">WU_APOPTOSIS_BY_CDKN1A_VIA_TP53</a>                                                   |
| <a href="#">KUMAMOTO_RESPONSE_TO_NUTLIN_3A_DN</a>                                                 |
| <a href="#">KUMAMOTO_RESPONSE_TO_NUTLIN_3A_UP</a>                                                 |
| <b>BRCA and DNA repair</b>                                                                        |
| <a href="#">HONRADO_BREAST_CANCER_BRCA1_VS_BRCA2</a>                                              |
| <a href="#">PUJANA_BREAST_CANCER_WITH_BRCA1_MUTATED_UP</a>                                        |
| <a href="#">BAE_BRCA1_TARGETS_UP</a>                                                              |
| <a href="#">MACLACHLAN_BRCA1_TARGETS_UP</a>                                                       |
| <a href="#">PID_ATR_PATHWAY</a>                                                                   |
| <b>E2F</b>                                                                                        |
| <a href="#">OLSSON_E2F3_TARGETS_DN</a>                                                            |
| <a href="#">CROSBY_E2F4_TARGETS</a>                                                               |
| <a href="#">REN_BOUND_BY_E2F</a>                                                                  |
| <a href="#">EGUCHI_CELL_CYCLE_RB1_TARGETS</a>                                                     |
| <a href="#">REACTOME_REGULATION_OF_MITOTIC_CELL_CYCLE</a>                                         |
| <a href="#">MOLENAAR_TARGETS_OF_CCND1_AND_CDK4_DN</a>                                             |
| <a href="#">VERNELL_RETINOBLASTOMA_PATHWAY_UP</a>                                                 |
| <b>Myc</b>                                                                                        |
| <a href="#">SCHUHMACHER_MYC_TARGETS_UP</a>                                                        |
| <a href="#">MENSSEN_MYC_TARGETS</a>                                                               |
| <a href="#">COLLER_MYC_TARGETS_UP</a>                                                             |
| <a href="#">SCHLOSSER_MYC_AND_SERUM_RESPONSE_SYNERGY</a>                                          |
| <a href="#">ODONNELL_TARGETS_OF_MYC_AND_TFRC_UP</a>                                               |
| <a href="#">COLLER_MYC_TARGETS_DN</a>                                                             |
| <a href="#">KIM_MYC_AMPLIFICATION_TARGETS_DN</a>                                                  |
| <a href="#">CEBALLOS_TARGETS_OF_TP53_AND_MYC_DN</a>                                               |
| <a href="#">SCHLOSSER_MYC_TARGETS_AND_SERUM_RESPONSE_DN</a>                                       |
| <a href="#">ODONNELL_TARGETS_OF_MYC_AND_TFRC_DN</a>                                               |
| <a href="#">DANG_REGULATED_BY_MYC_UP</a>                                                          |
| <b>EGF</b>                                                                                        |
| <a href="#">AMIT_EGF_RESPONSE_120_HELA</a>                                                        |
| <a href="#">AMIT_EGF_RESPONSE_480_MCF10A</a>                                                      |
| <a href="#">AMIT_EGF_RESPONSE_20_HELA</a>                                                         |
| <a href="#">ZWANG_EGF_INTERVAL_UP</a>                                                             |
| <a href="#">NAGASHIMA_EGF_SIGNALING_UP</a>                                                        |
| <b>Aurora</b>                                                                                     |
| <a href="#">PID_AURORA_B_PATHWAY</a>                                                              |
| <a href="#">PID_AURORA_A_PATHWAY</a>                                                              |
| <a href="#">OHASHI_AURKA_TARGETS</a>                                                              |
| <a href="#">OHASHI_AURKB_TARGETS</a>                                                              |
| <b>Antigen presentation</b>                                                                       |
| <a href="#">REACTOME_ANTIGEN_PRESENTATION_FOLDING_ASSEMBLY_AND_PEPTIDE_LOADING_OF_CLASS_I_MHC</a> |
| <a href="#">REACTOME_MHC_CLASS_II_ANTIGEN_PRESENTATION</a>                                        |
| <a href="#">KEGG_ANTIGEN_PROCESSING_AND_PRESENTATION</a>                                          |
| <b>Metastasis</b>                                                                                 |
| <a href="#">ZUCCHI_METASTASIS_UP</a>                                                              |
| <a href="#">CHANDRAN_METASTASIS_TOP50_DN</a>                                                      |
| <a href="#">RAMASWAMY_METASTASIS_UP</a>                                                           |
| <a href="#">SUNG_METASTASIS_STROMA_UP</a>                                                         |
| <b>Multiple myeloma</b>                                                                           |
| <a href="#">CORRE_MULTIPLE_MYELOMA_UP</a>                                                         |
| <a href="#">DAVIES_MULTIPLE_MYELOMA_VS_MGUS_DN</a>                                                |
| <a href="#">ZHAN_MULTIPLE_MYELOMA_PR_UP</a>                                                       |
| <b>RAS</b>                                                                                        |
| <a href="#">SWEET_KRAS_TARGETS_UP</a>                                                             |
| <a href="#">CHIARADONNA_NEOPLASTIC_TRANSFORMATION_KRAS_CDC25_DN</a>                               |
| <a href="#">SWEET_KRAS_ONCOGENIC_SIGNATURE</a>                                                    |
